# Supplementary material for: Novel branched coumarin dyes for dye-sensitized solar cells: significant improvement in photovoltaic performance by simple structure modification
Source: Royal Society of Chemistry journal article supplement (doi:10.1039/c2jm32333h), 2012-01-01

*Electronic Supplementary Information*

## **Novel branched coumarin dyes for dye-sensitized solar cells: significant improvement in photovoltaic performance by simple structure modification†**

**Bo Liu,<sup>\*a</sup> Ran Wang,<sup>b</sup> Weijun Mi,<sup>a</sup> Xiaoyan Li,<sup>a</sup> and Haitao Yu<sup>\*a</sup>**

<sup>a</sup> *College of Chemistry and Material Science, Hebei Normal University, No. 20, East Road of Nan Er Huan, Shijiazhuang 050023, P. R. China. Tel: +86-311-86268311; E-mail: liubo@mail.hebtu.edu.cn; haitaoyu@mail.hebtu.edu.cn*

<sup>b</sup> *Graduate School, Hebei University of Science and Technology, No. 70, Yuhua East Road, Shijiazhuang, 050018, P. R. China.*

### **Contents**

1. NMR spectra of new compounds.

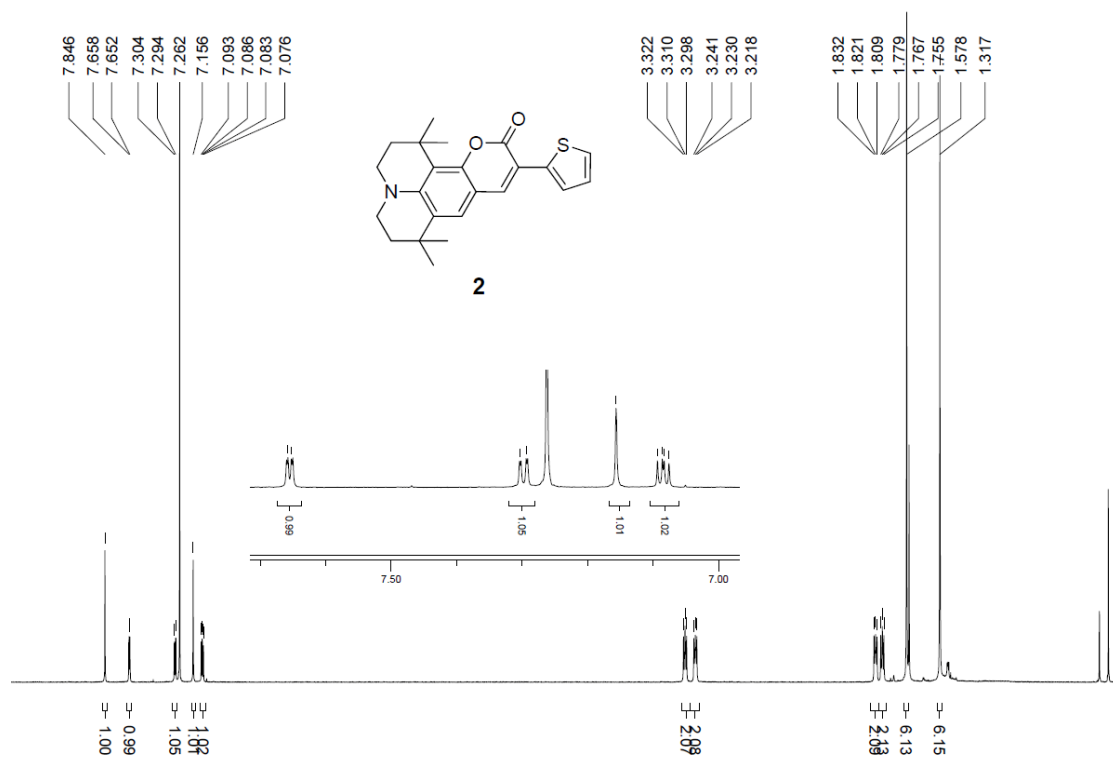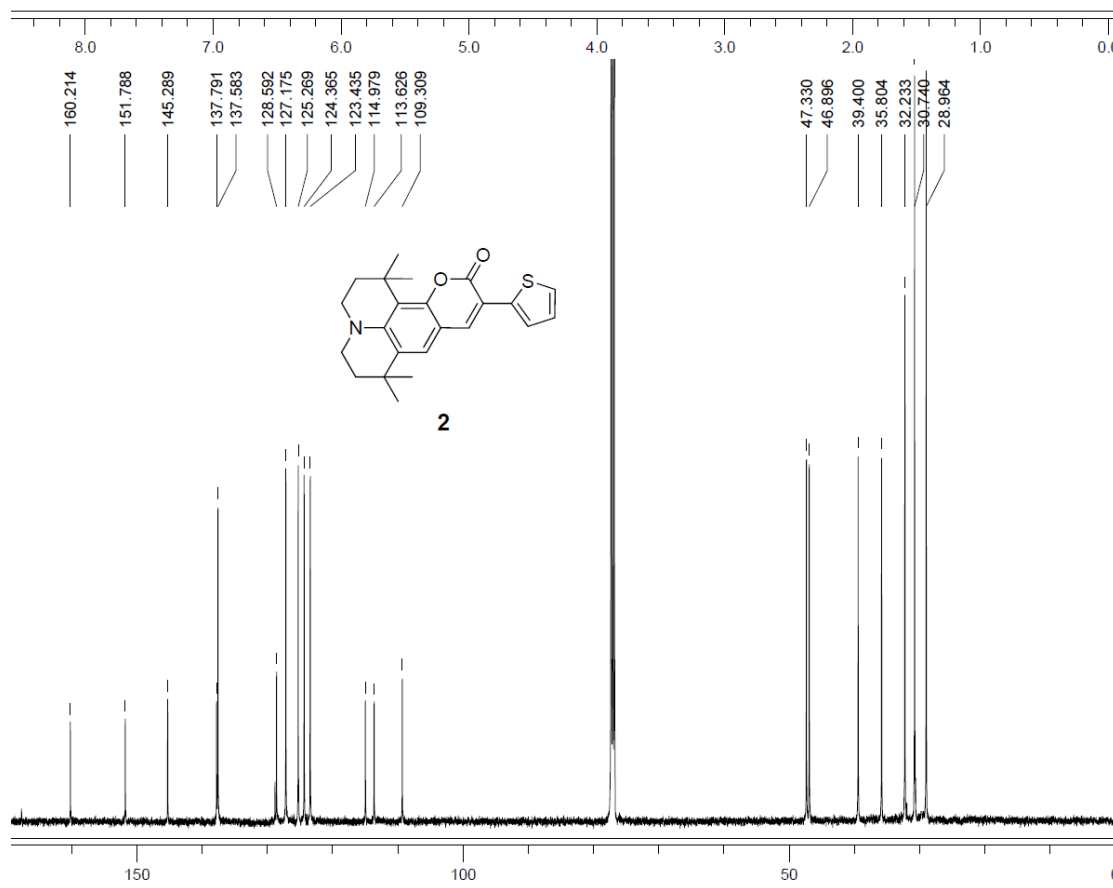

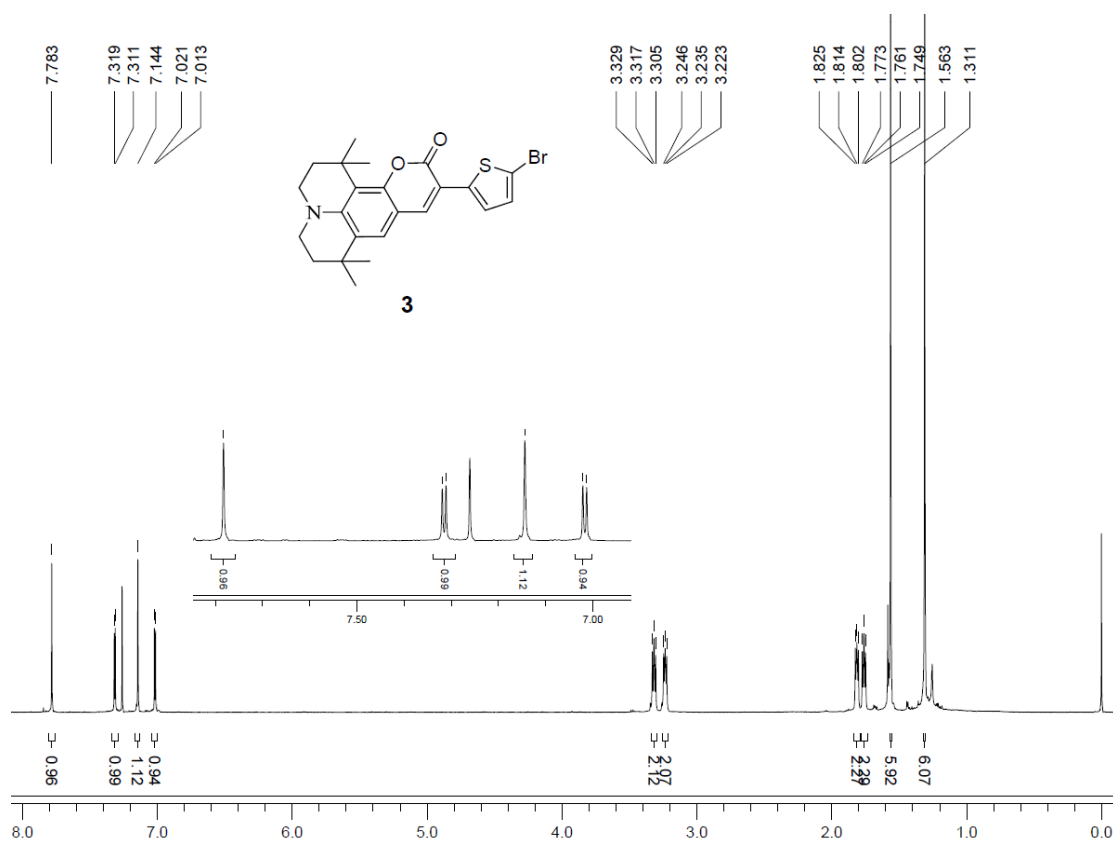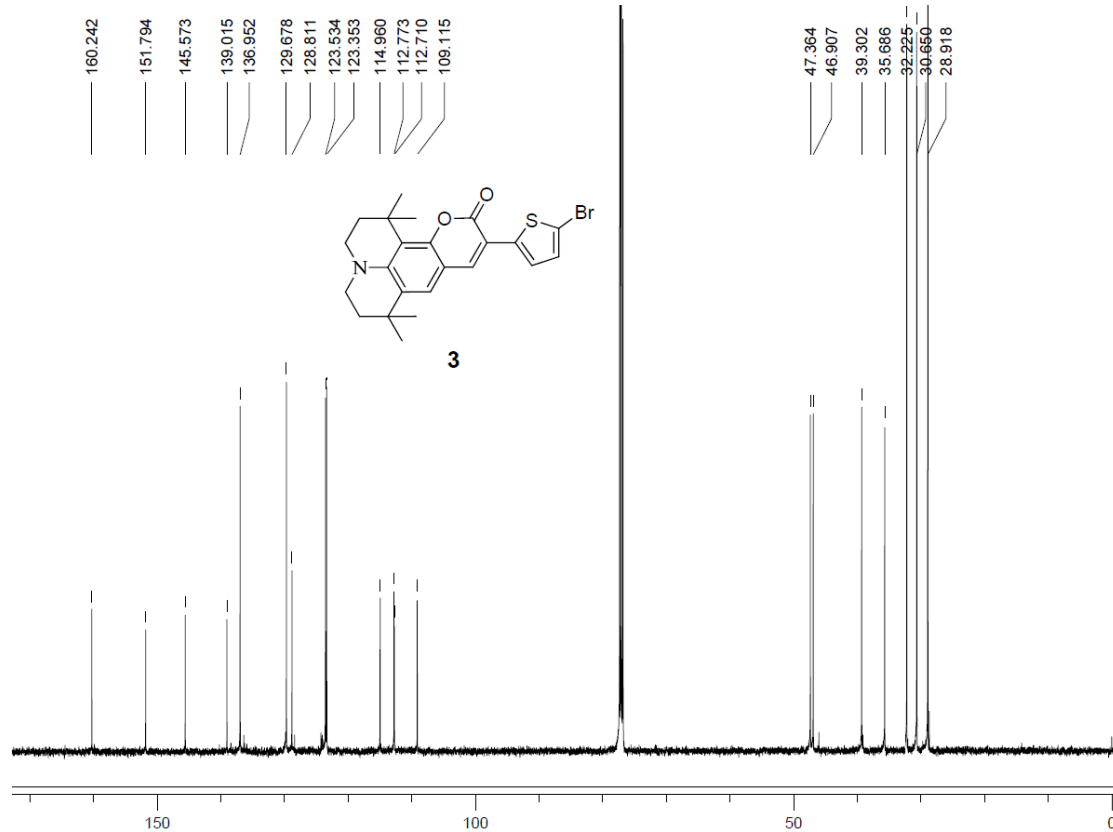

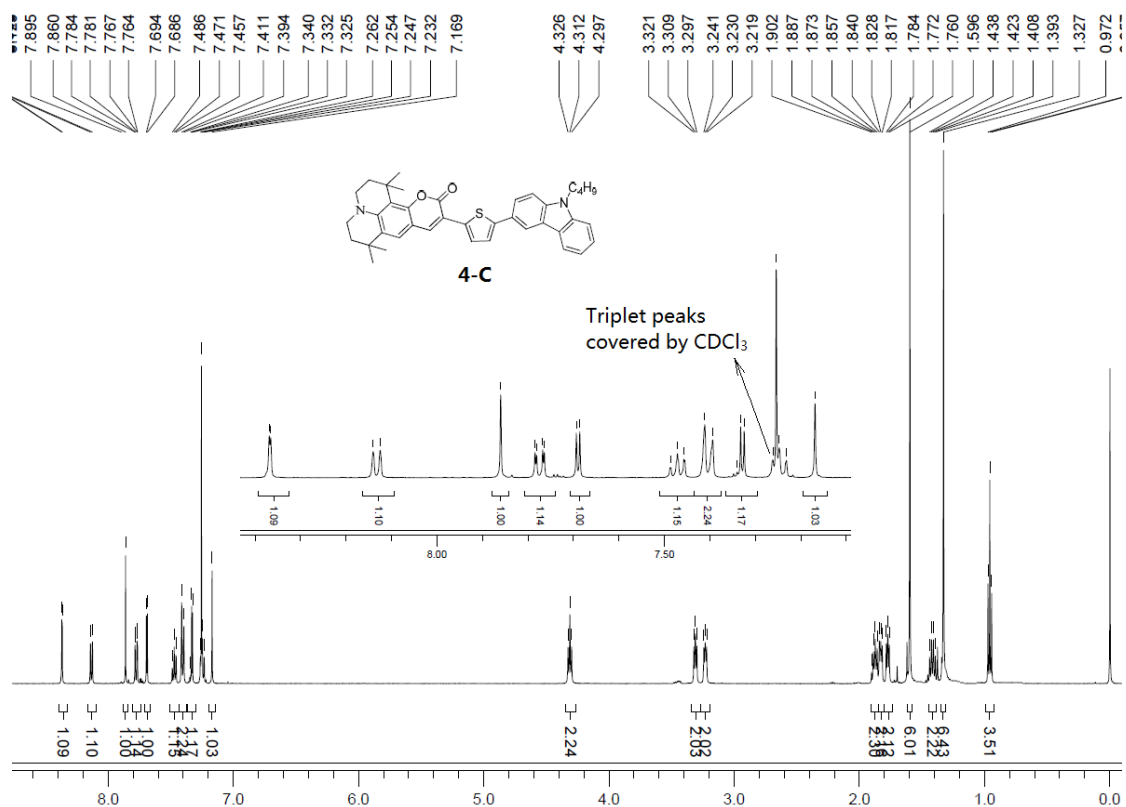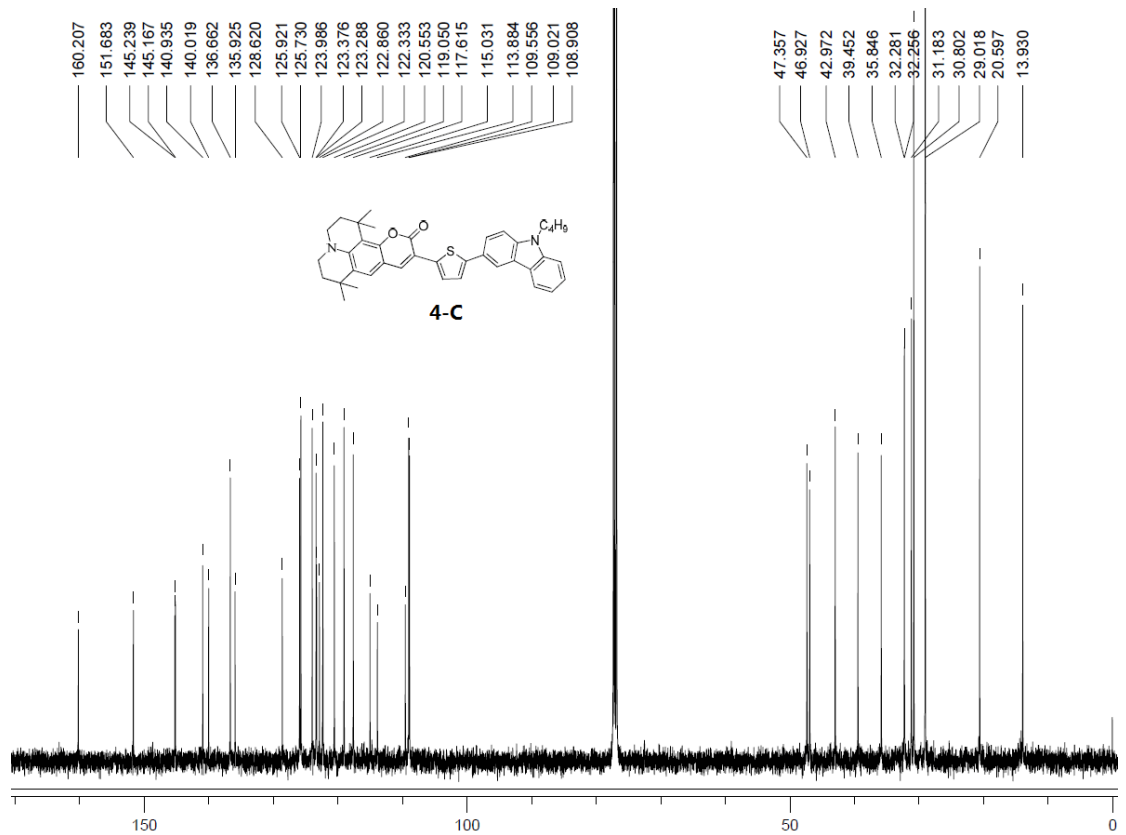

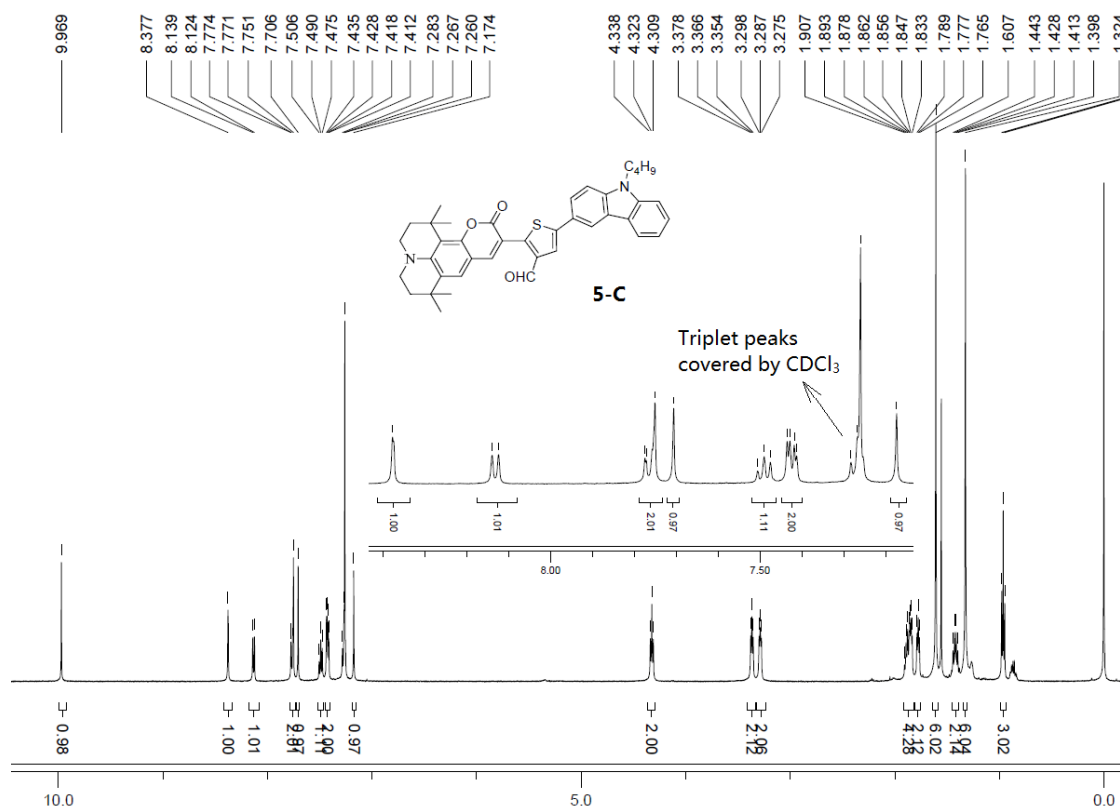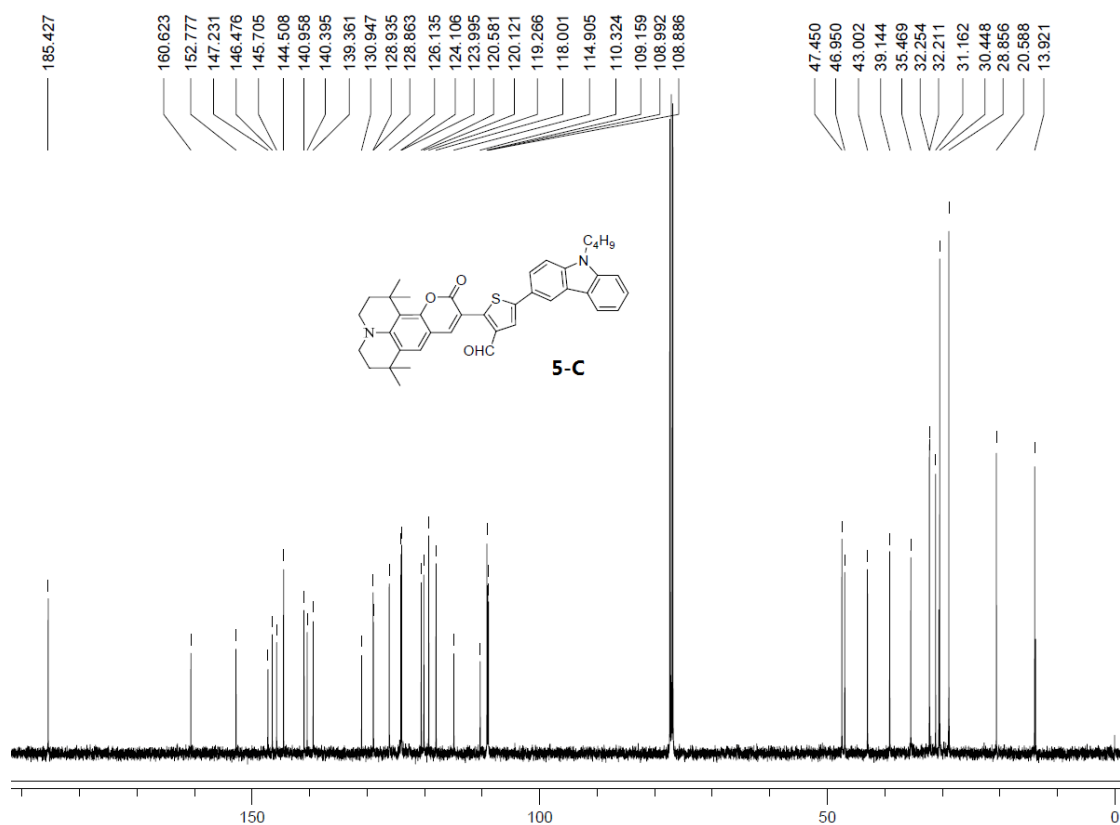

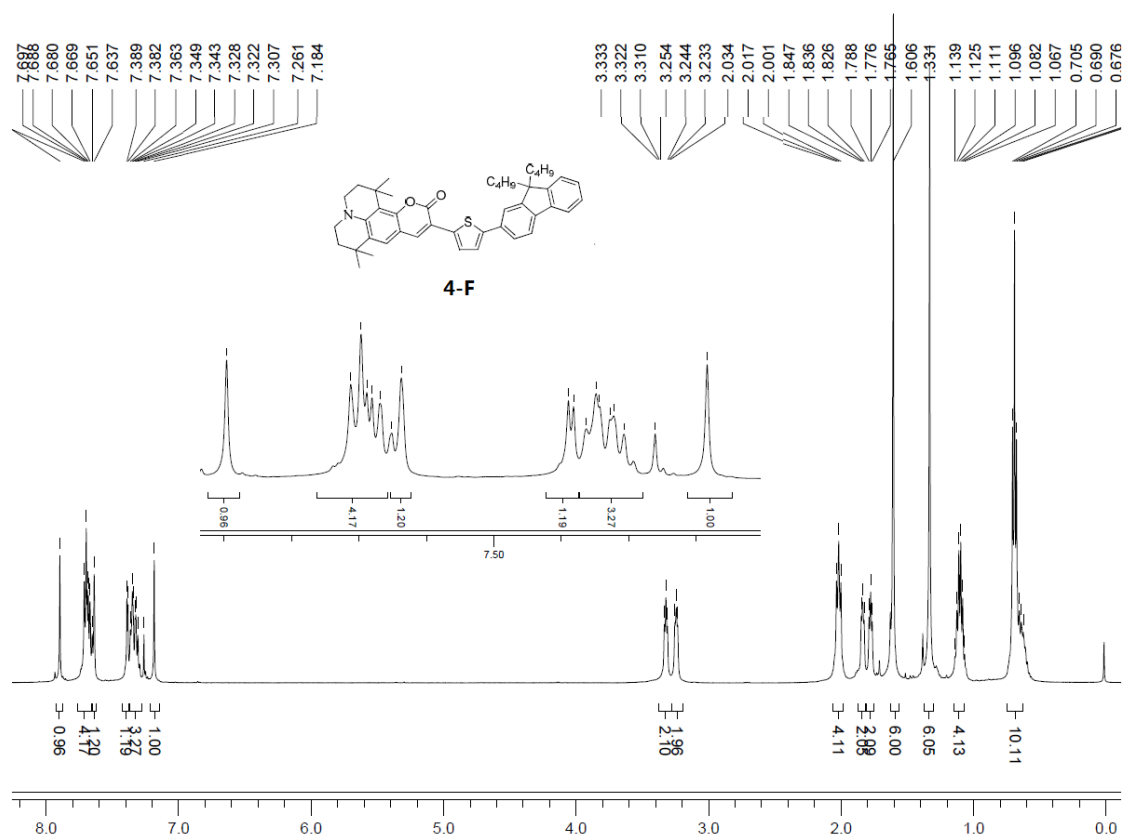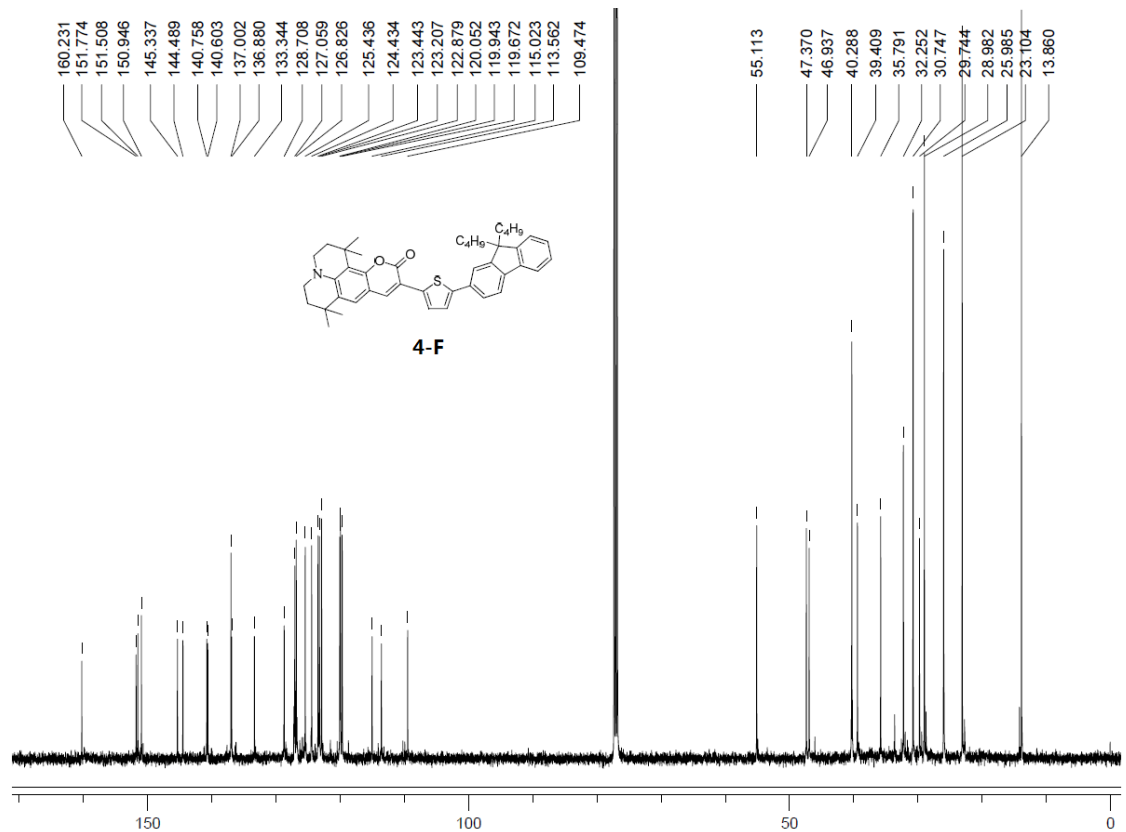

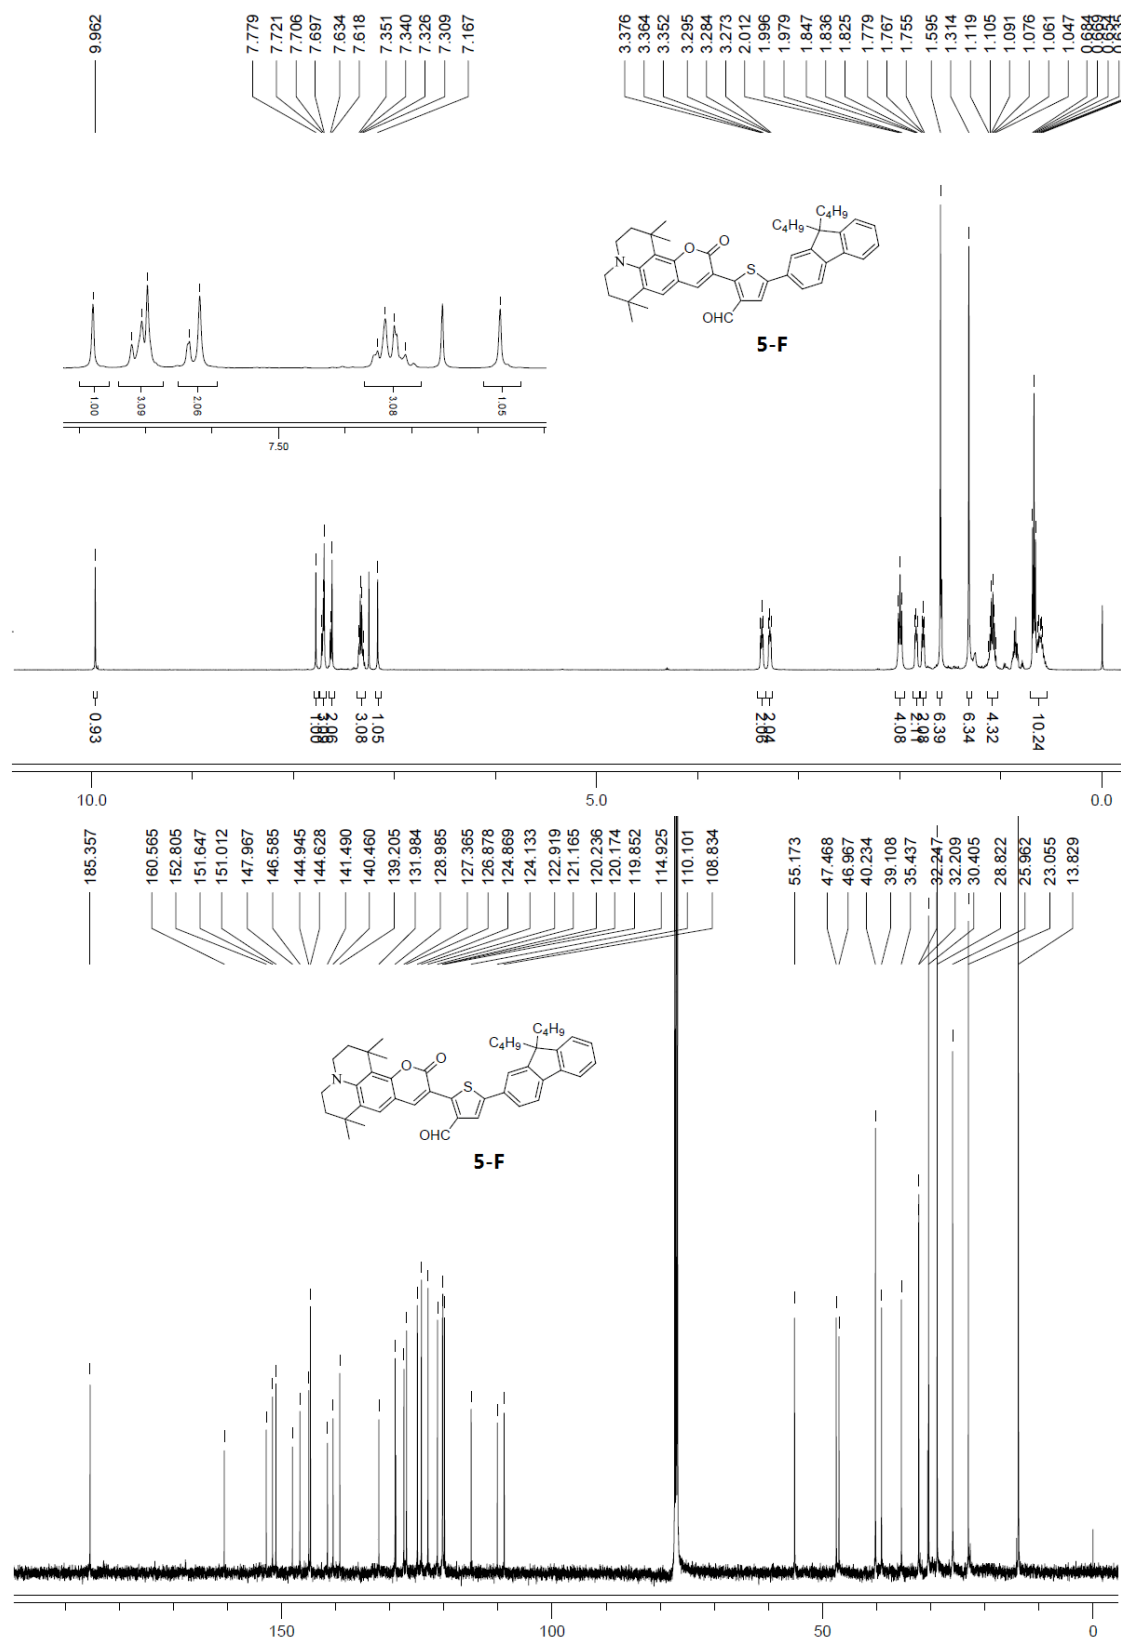

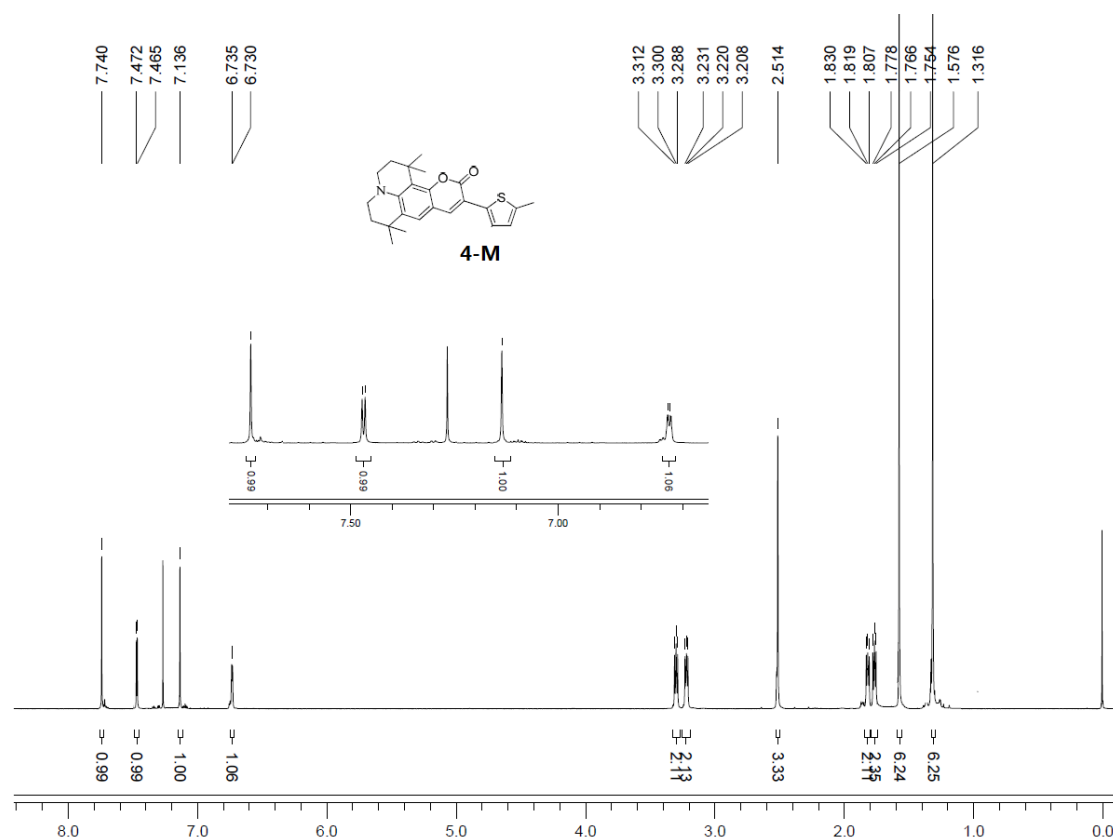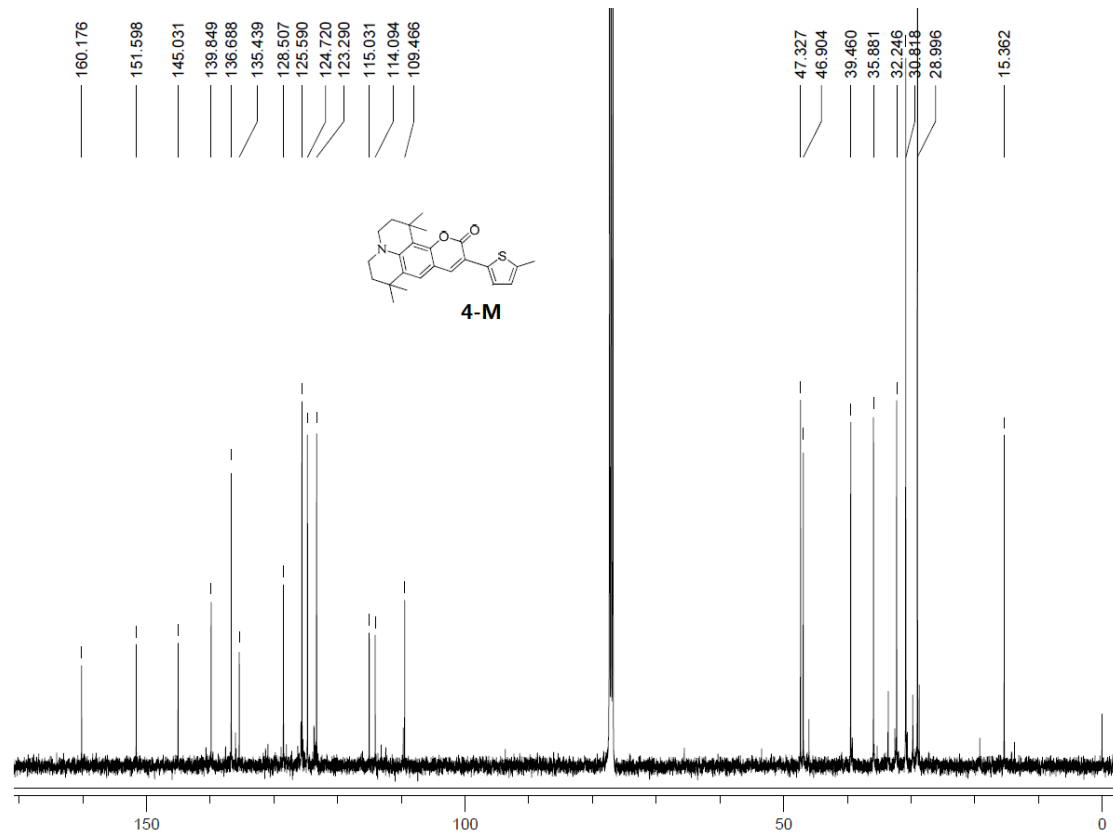



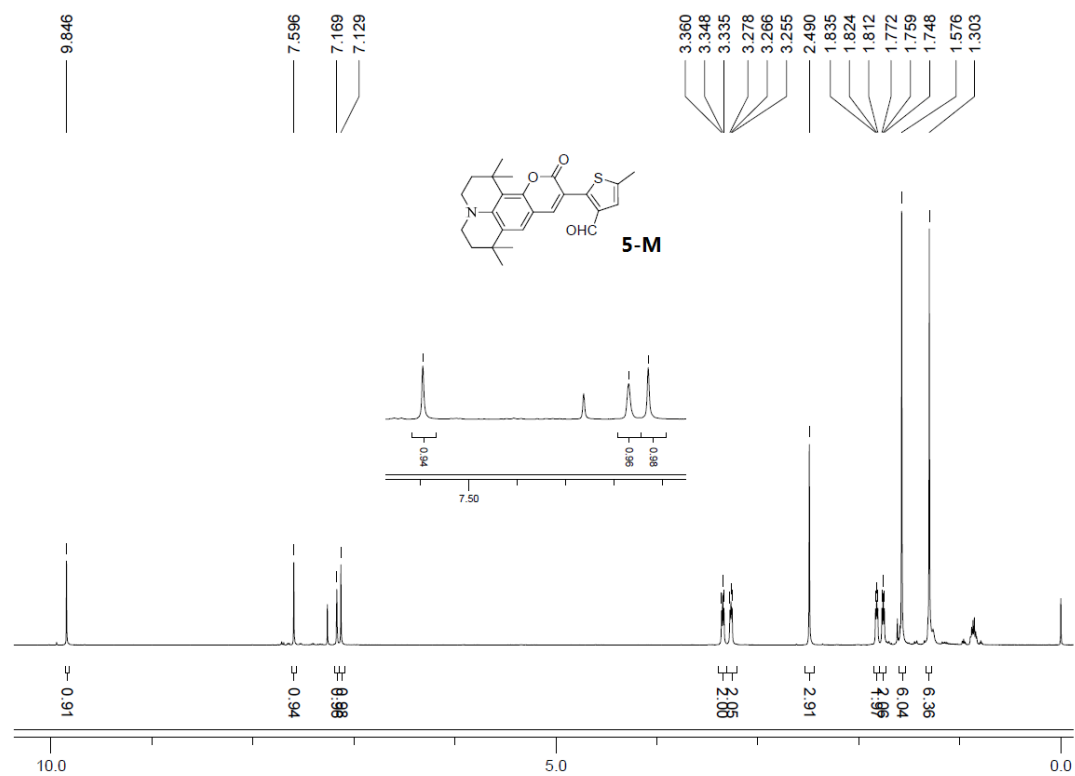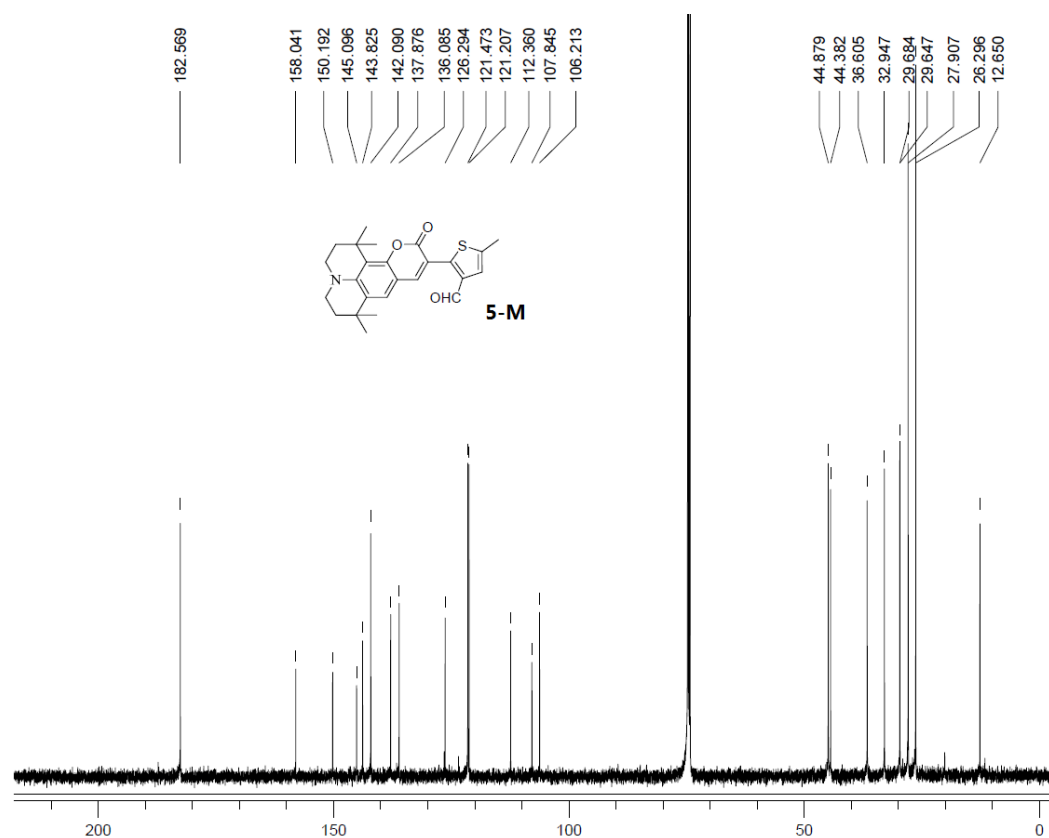

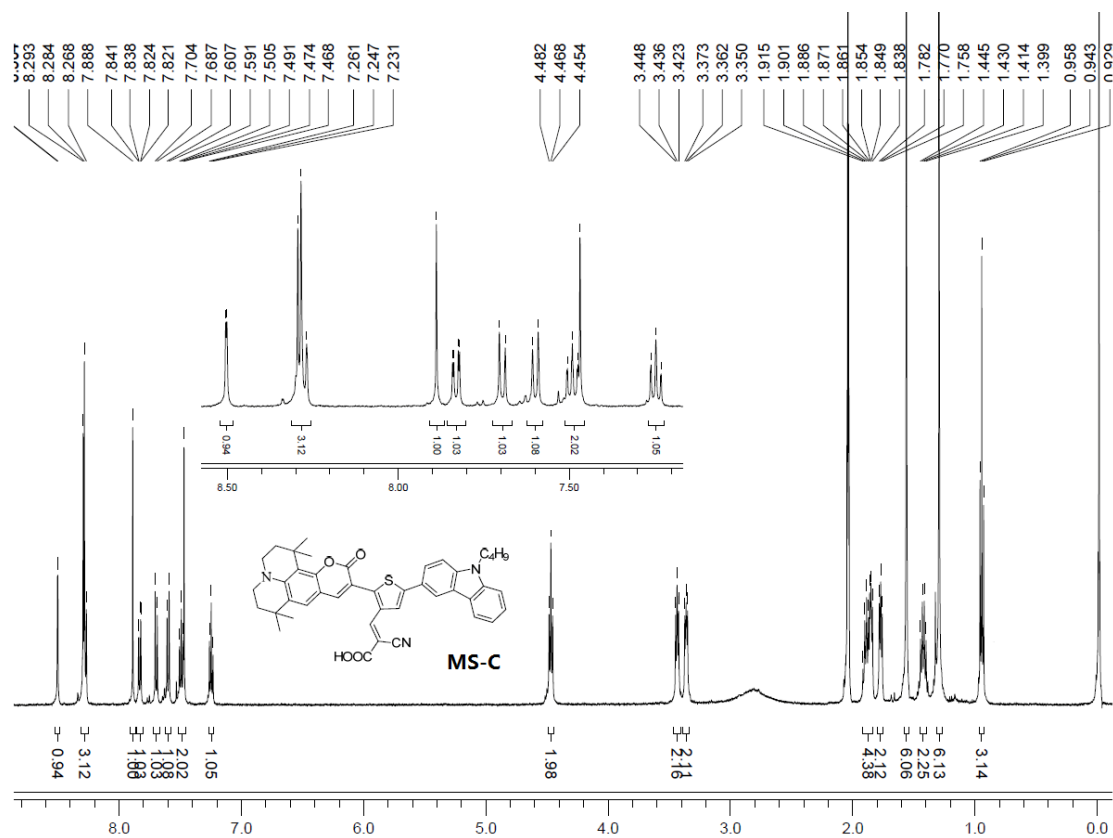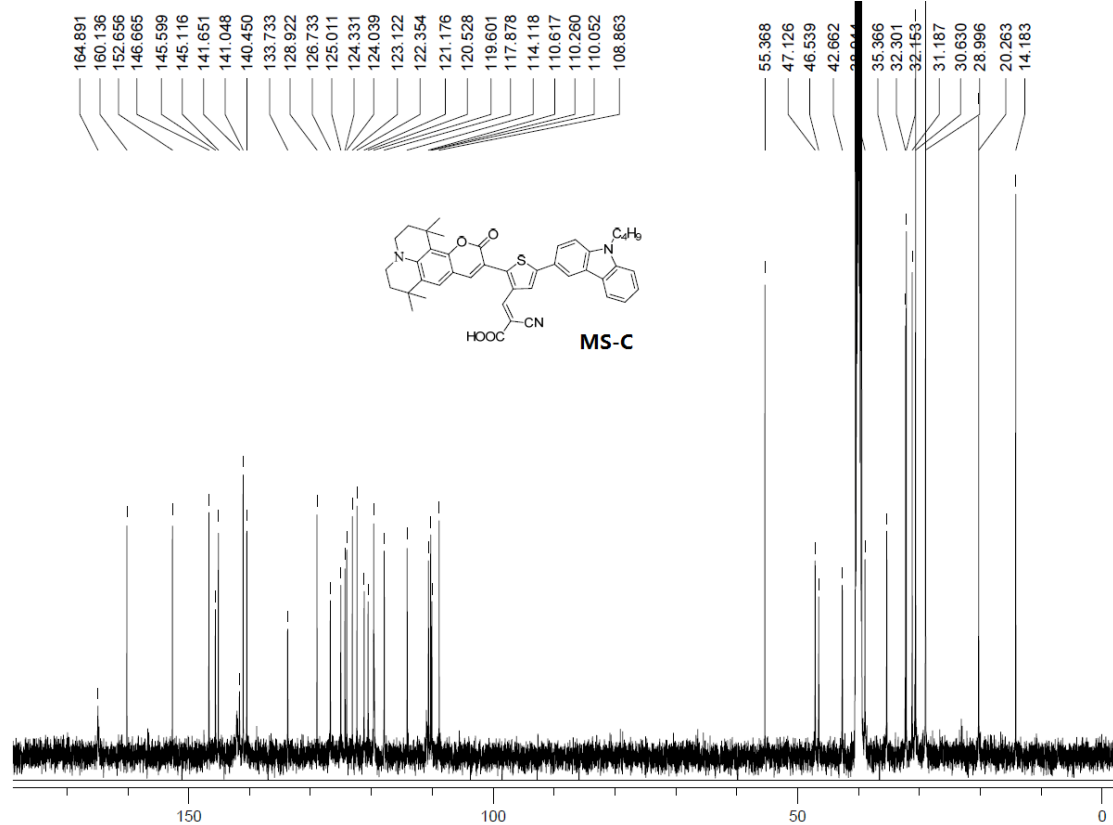

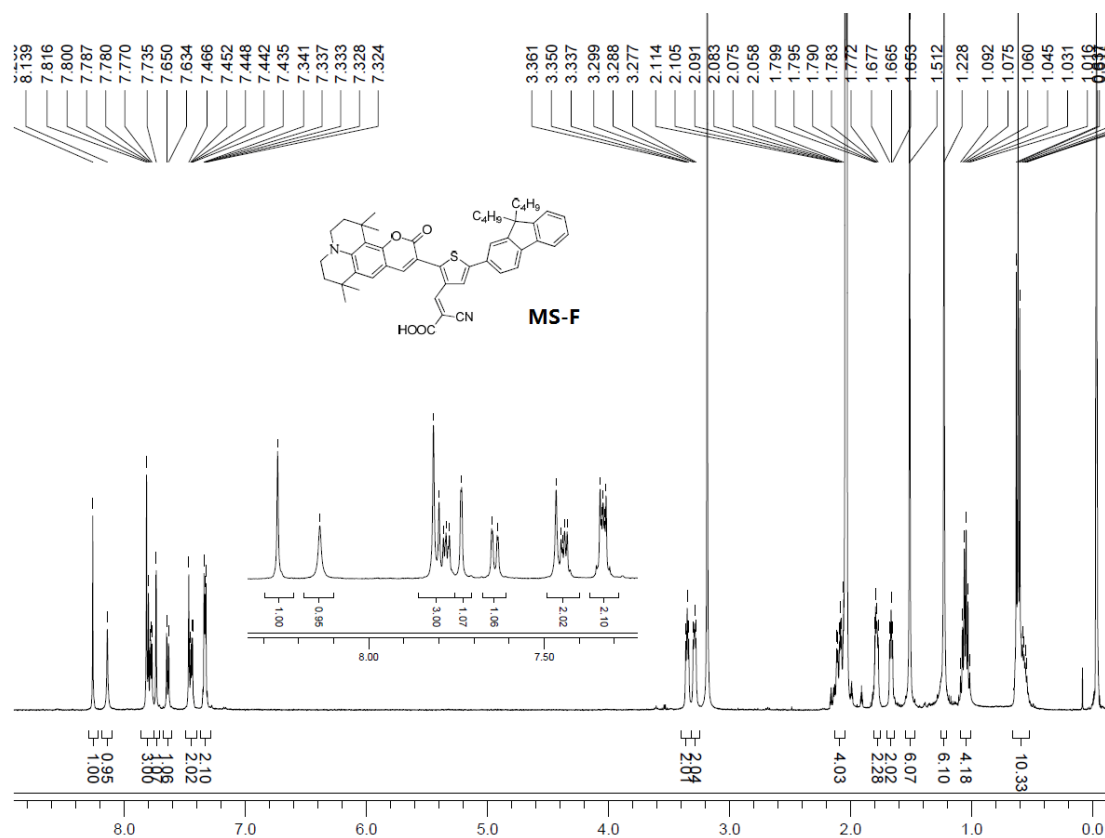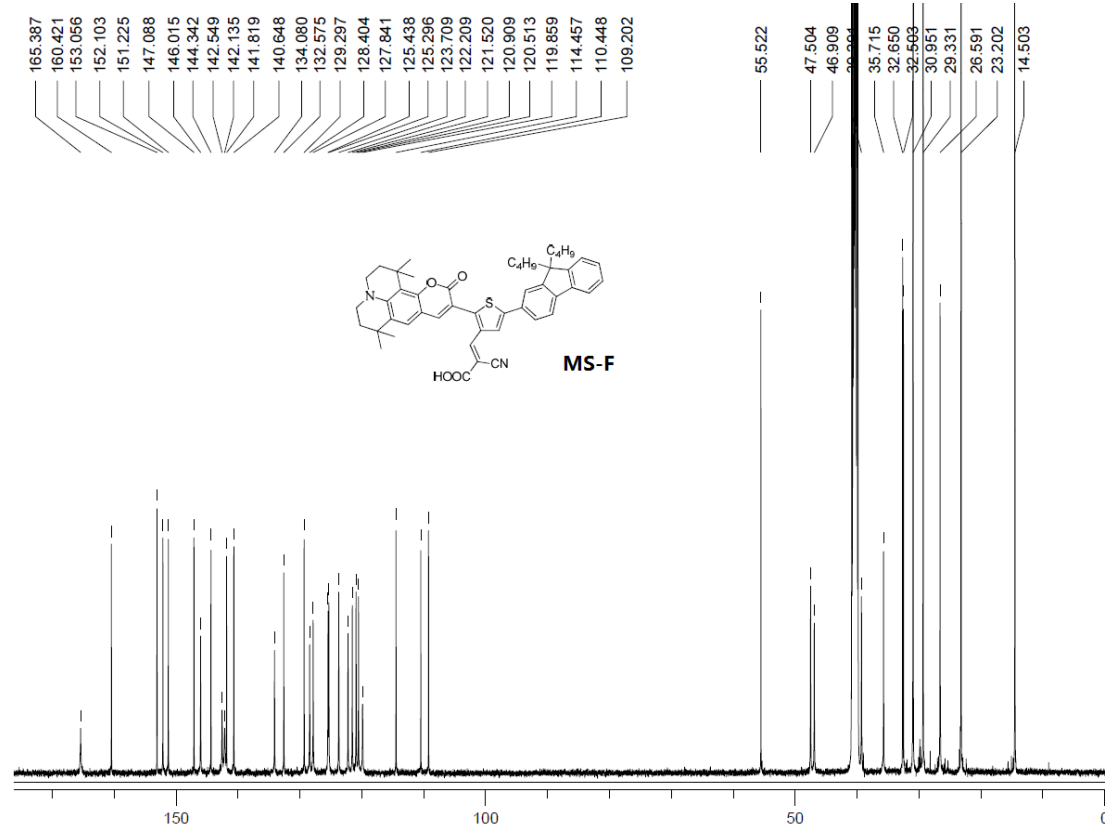

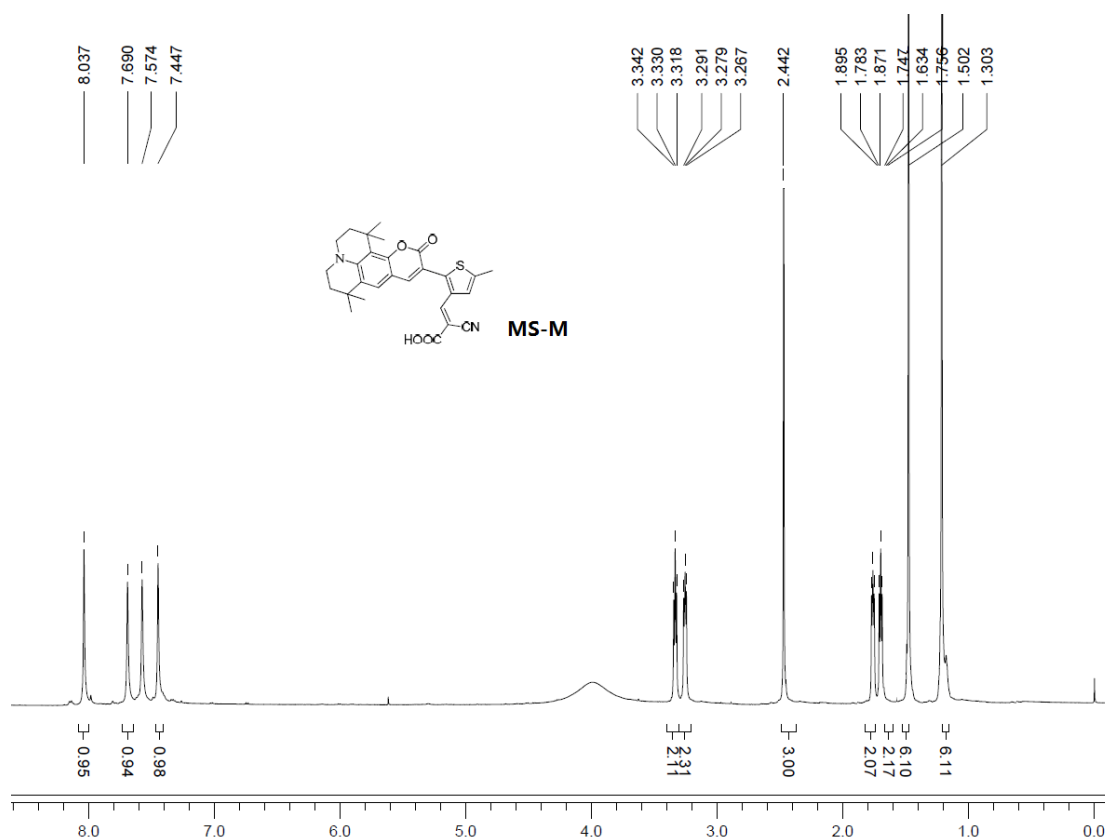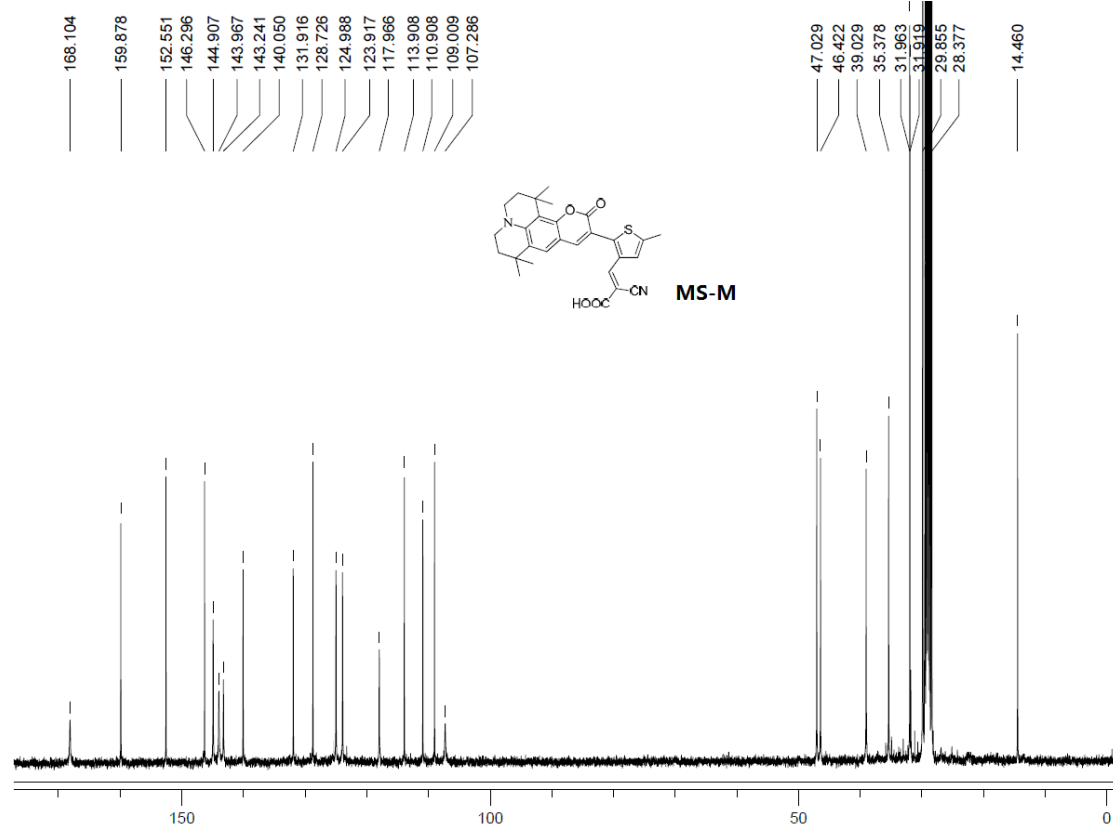

Supplement: c2jm32333h.pdf [file c2jm32333h.pdf]
